# Supplementary material for: CK1BP Reduces α-Synuclein Oligomerization and Aggregation Independent of Serine 129 Phosphorylation
Source: MDPI journal article supplement (doi:10.3390/cells10112830), 2021-10-21

Figure 2A (BiFC-α-Syn[WT])

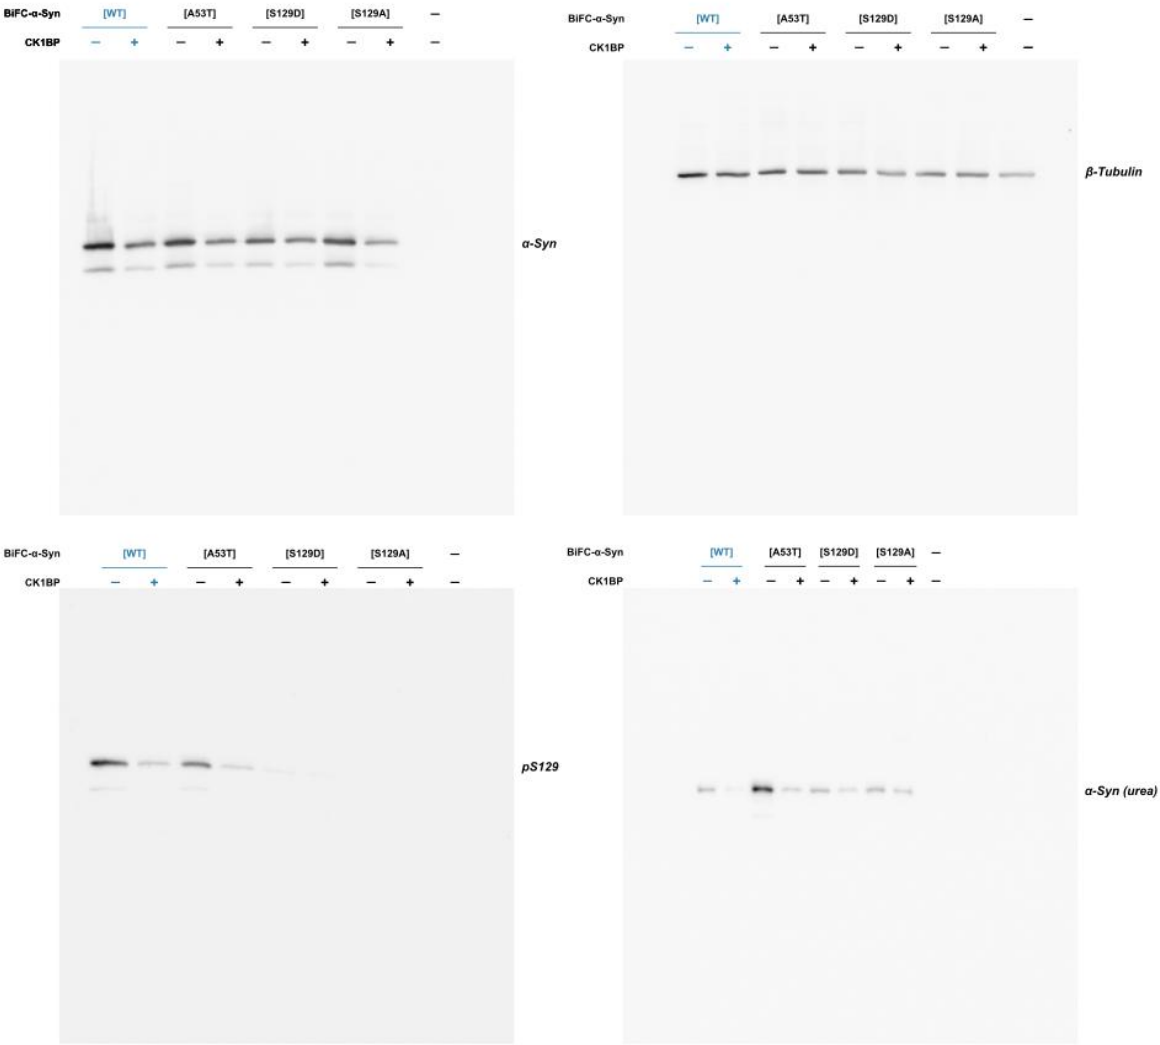

Figure 2A' (BiFC- $\alpha$ -Syn[A53T])

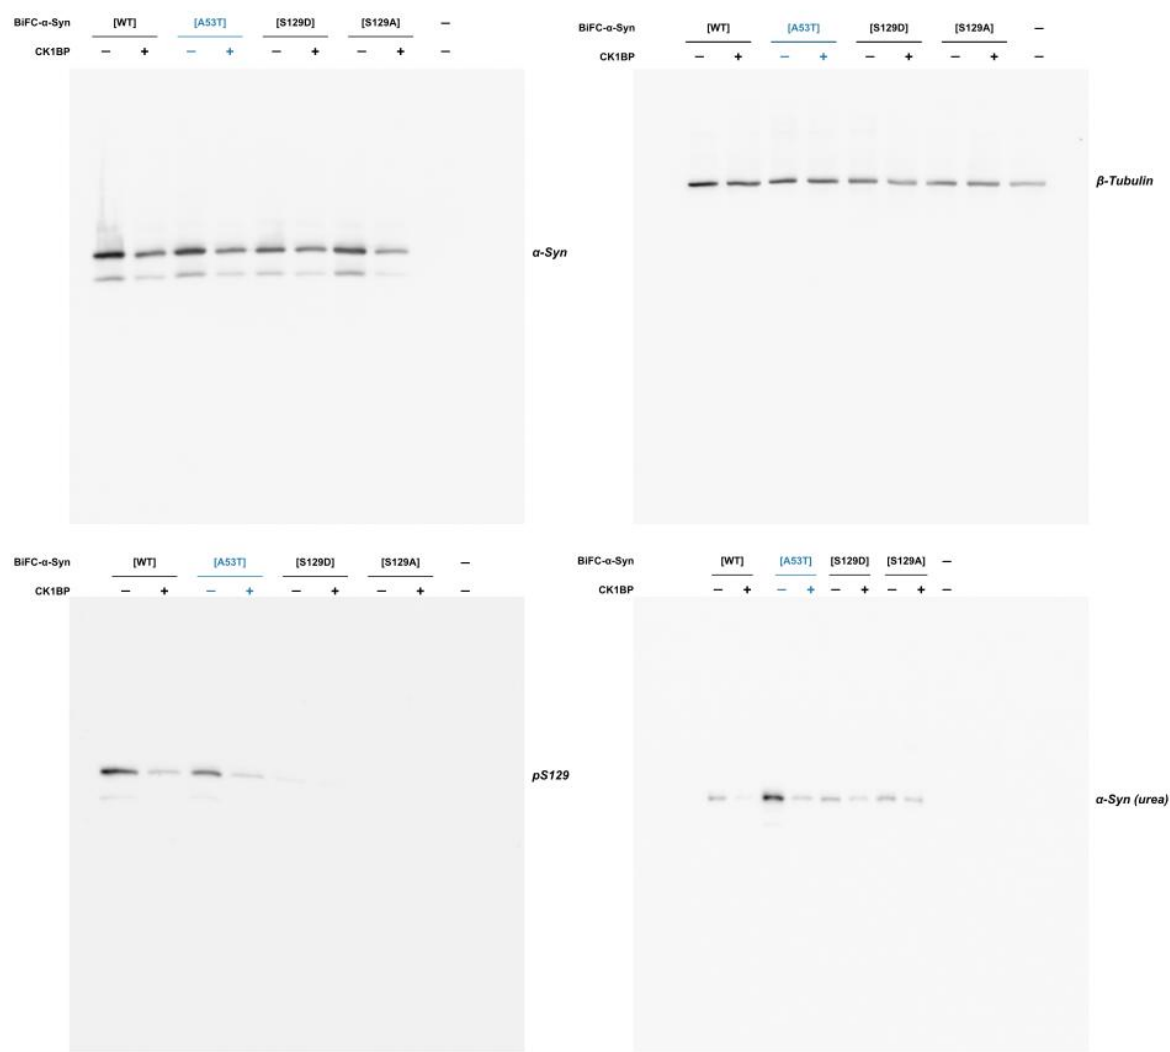

Figure 2A'' (untagged  $\alpha$ -Syn[WT])

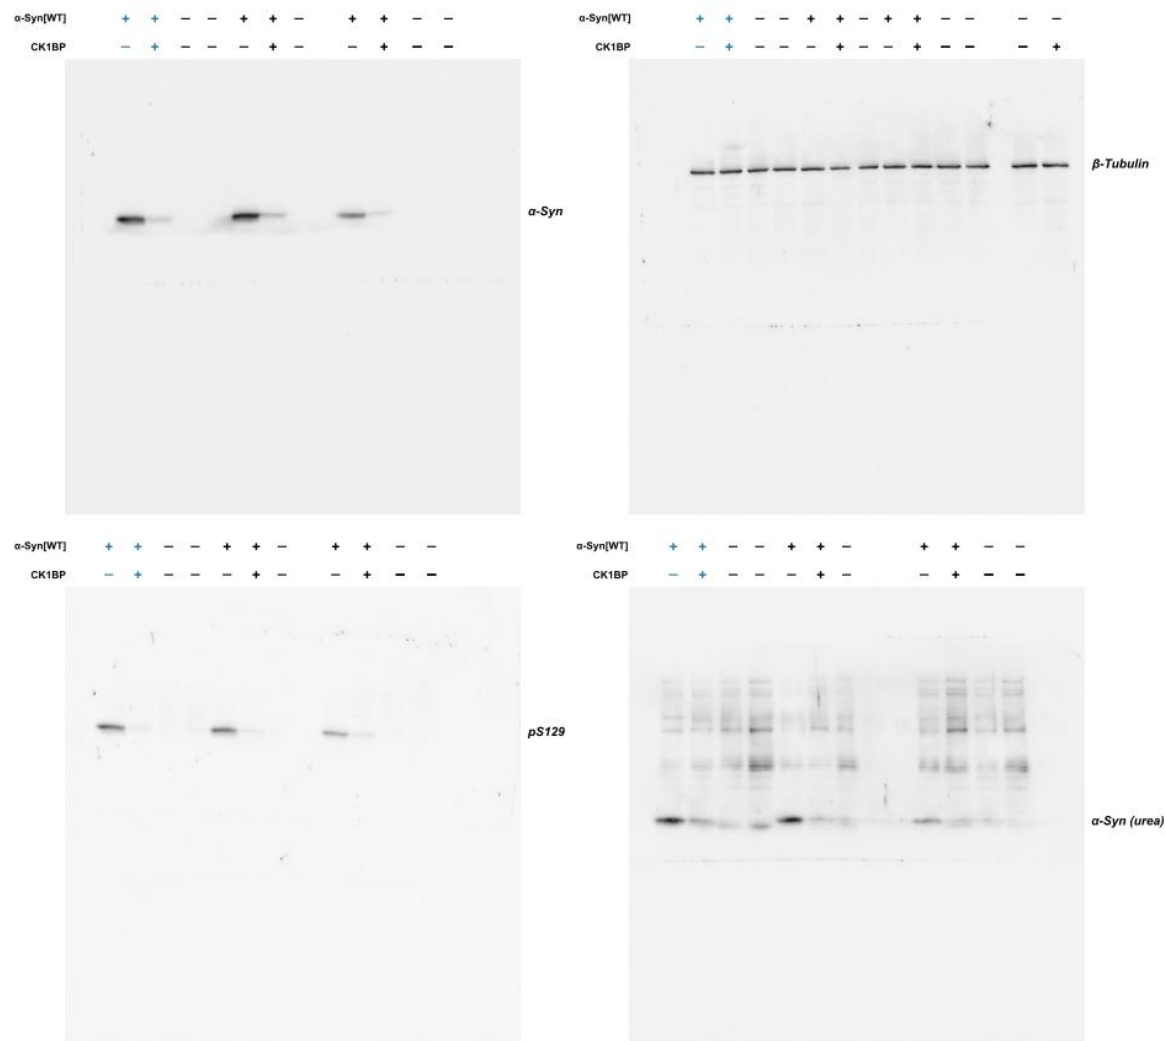

Figure 3D (BiFC-α-Syn[S129D])

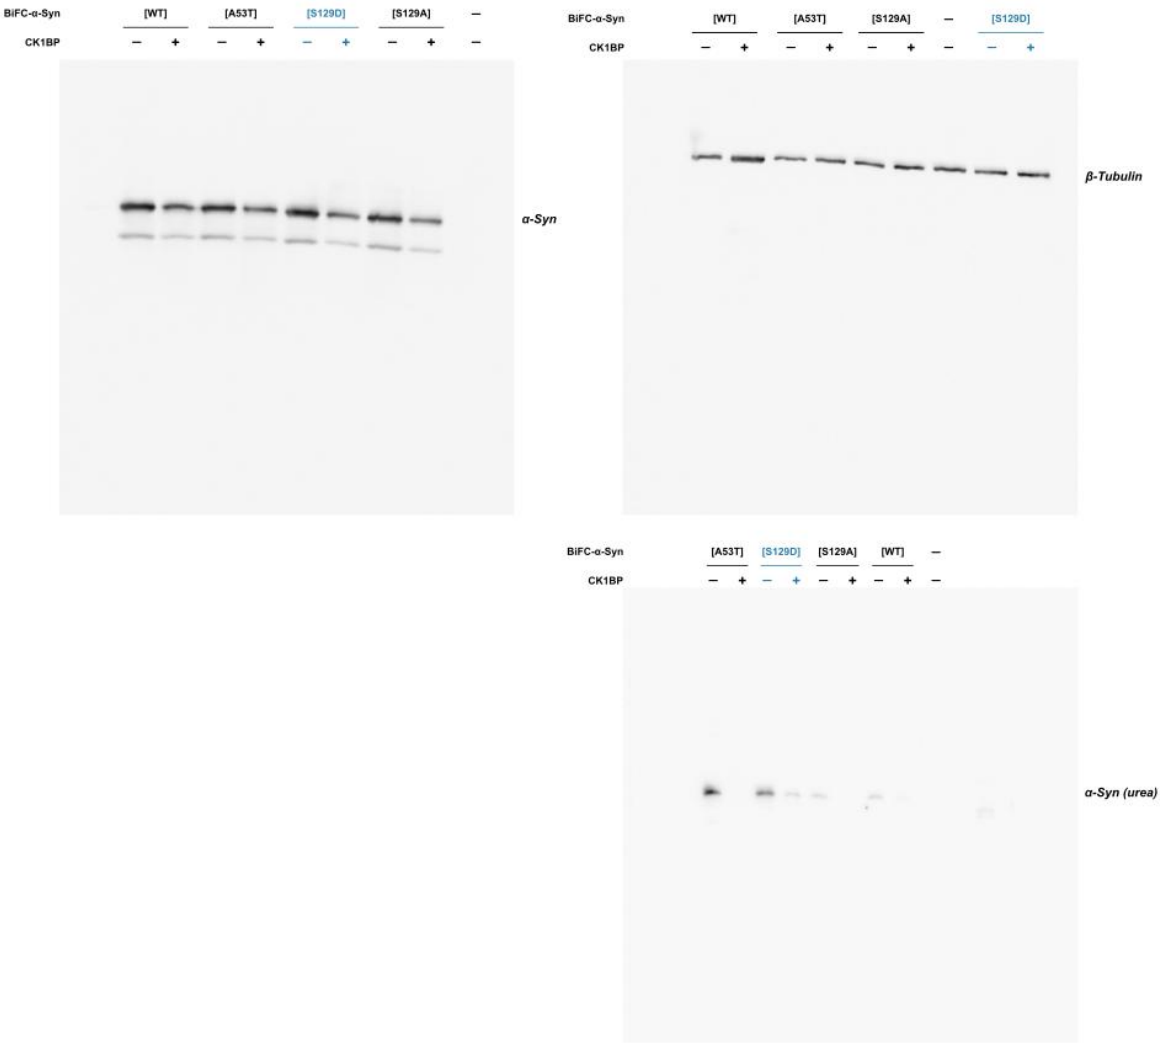

Figure 3D' (BiFC-α-Syn[S129A])

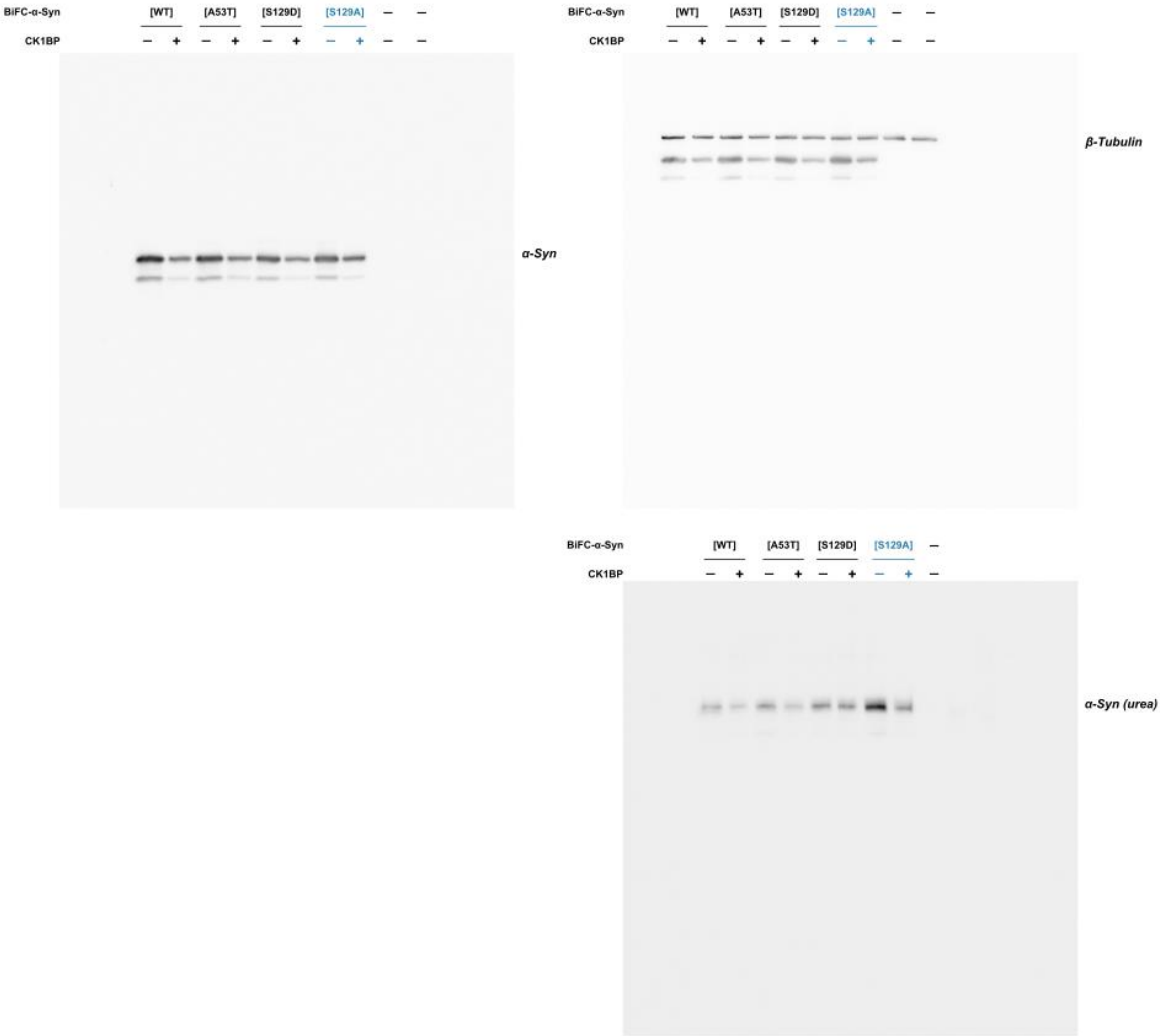

Figure 4E (GFP-polyQ)

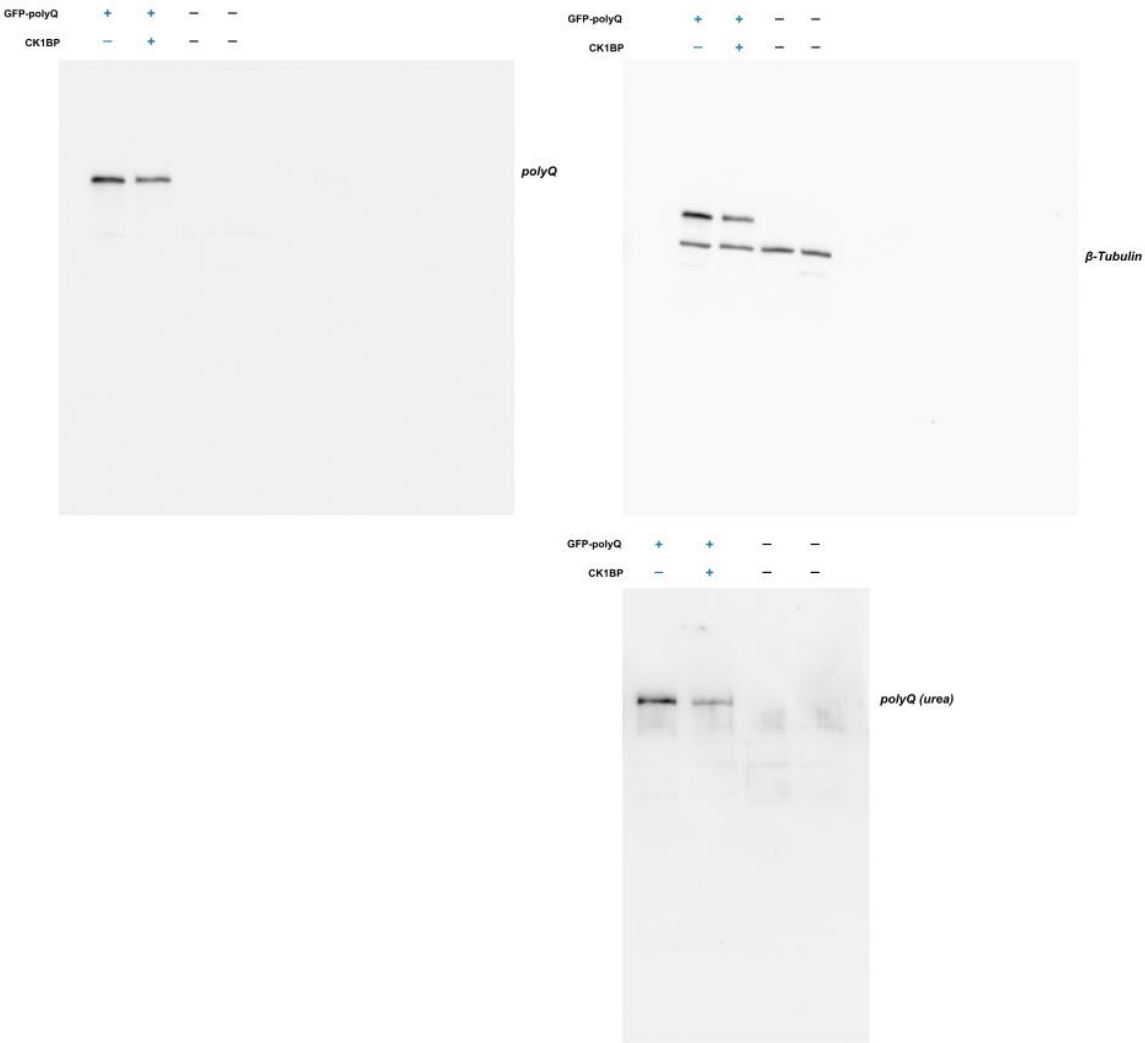

Figure A1B (CK1BP)

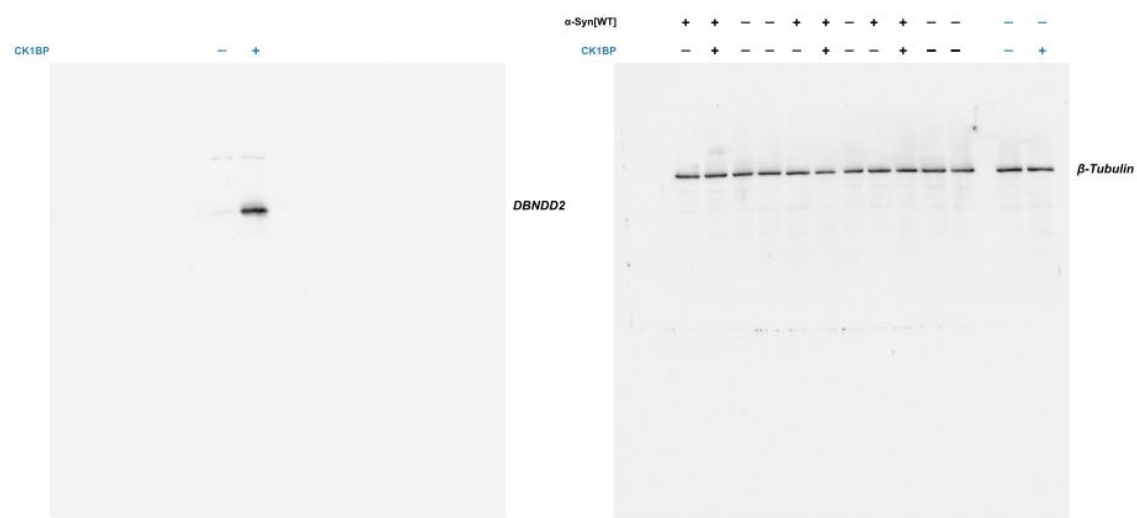

Figure A2C (BiFC- $\alpha$ -Syn[WT])

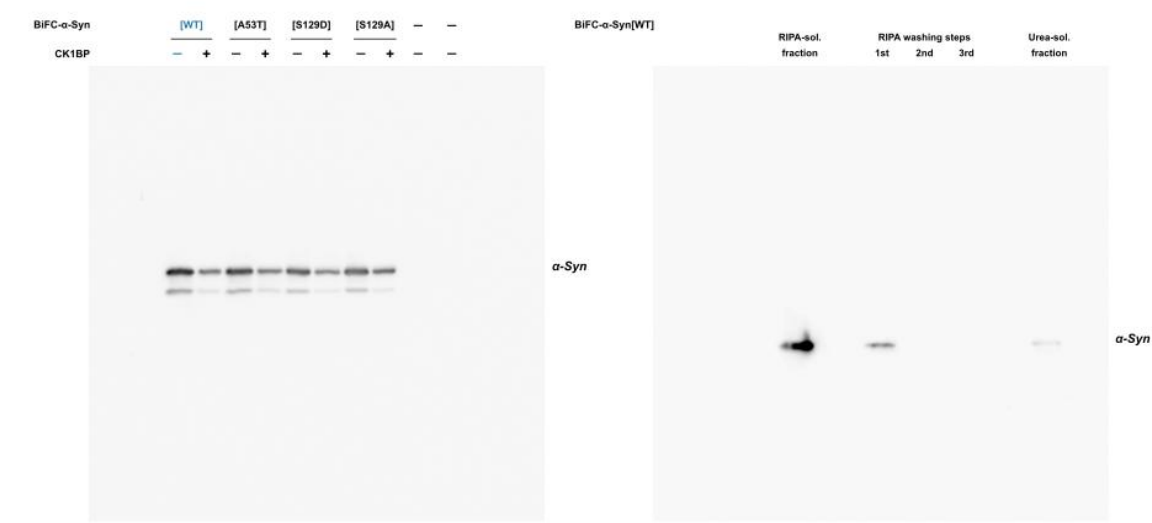

Figure A2C (untagged  $\alpha$ -Syn[WT])

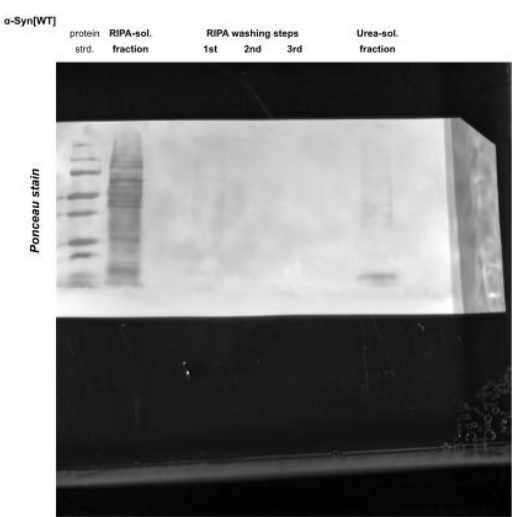



Figure B1E (BiFC- $\alpha$ -Syn)

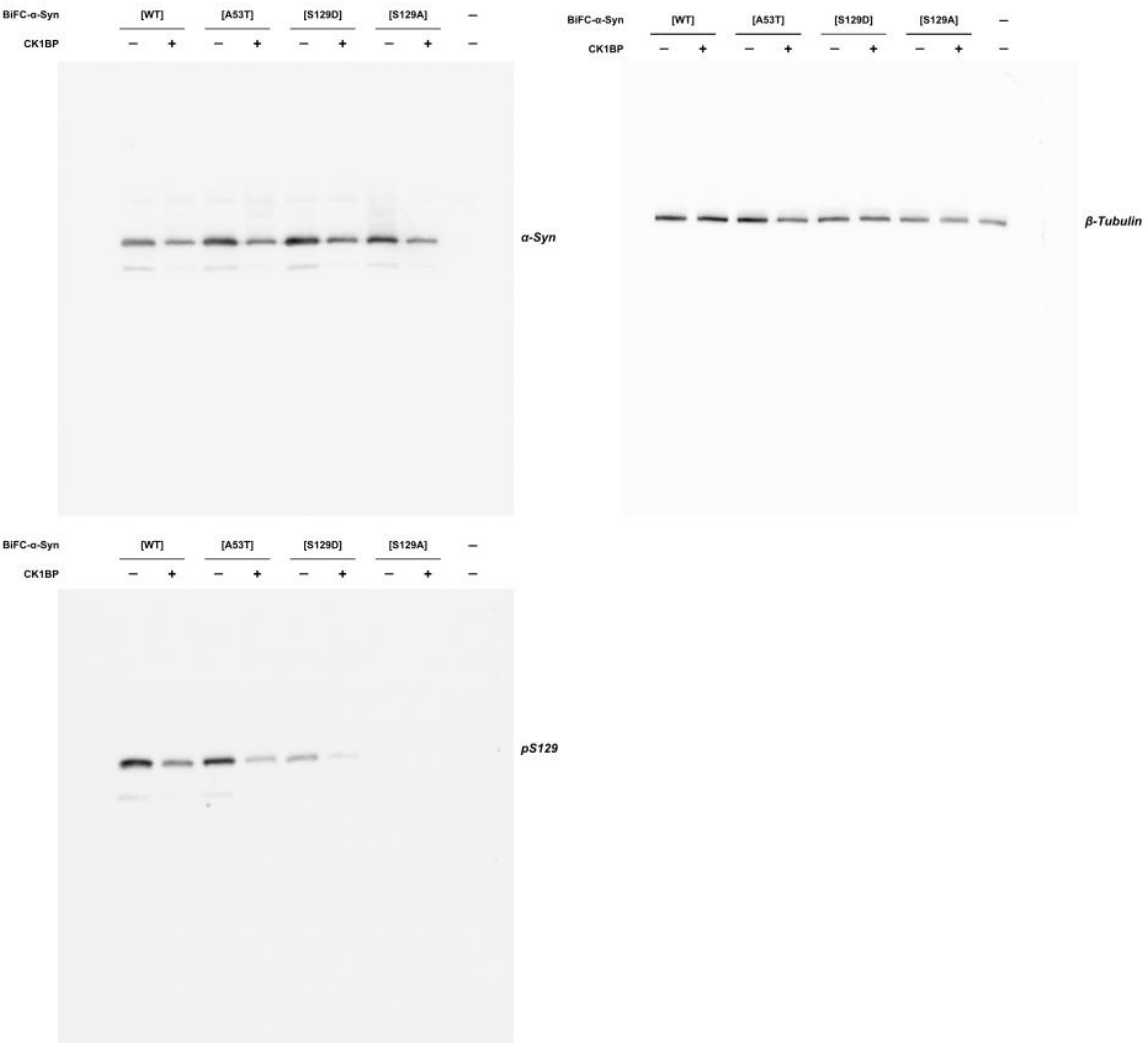

Figure B1F (BiFC-α-Syn[S129A])

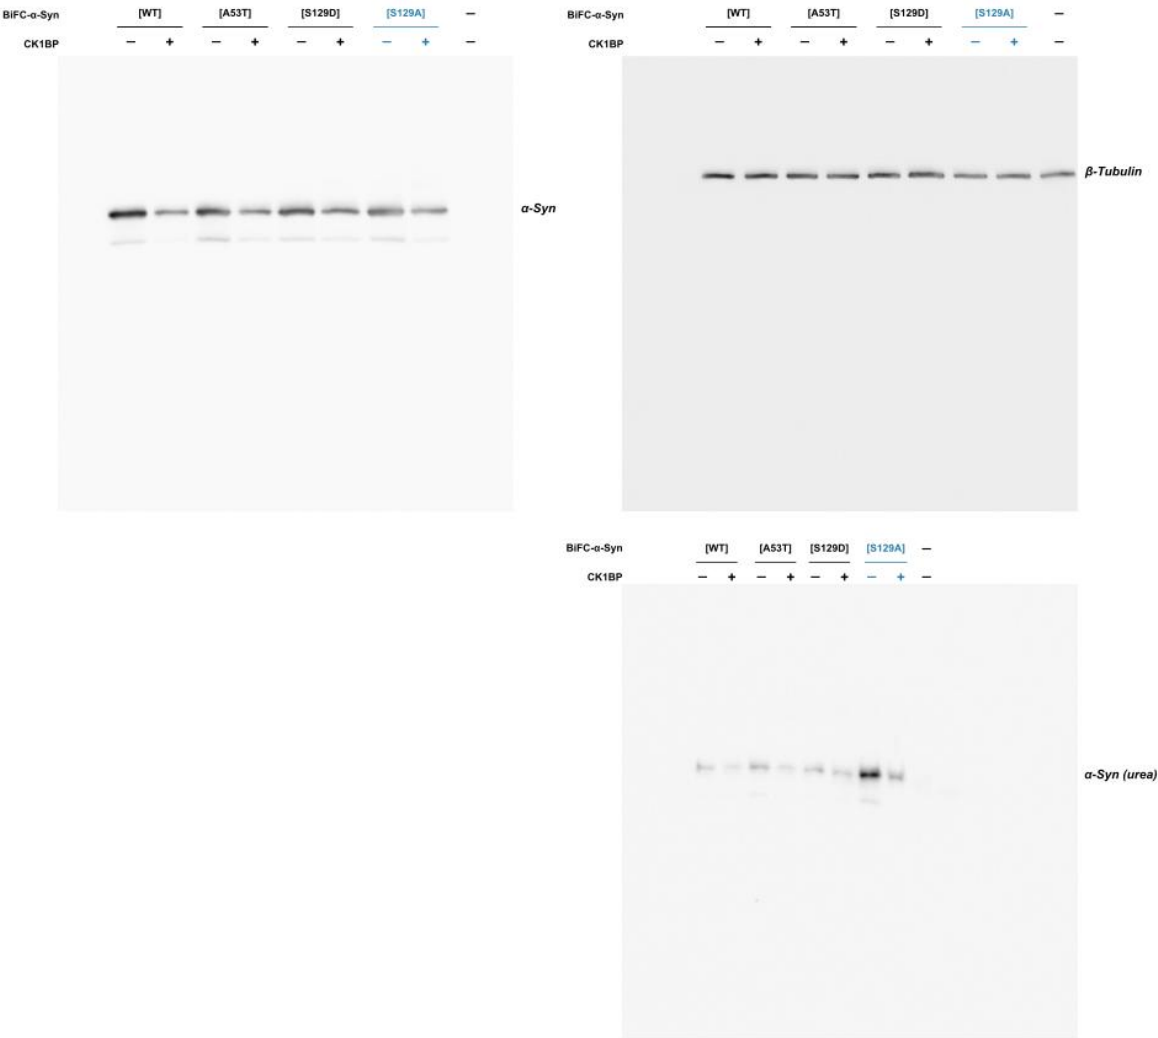

Supplement: s1 [file s1]
